# Supplementary material for: Effect of particle polydispersity on the structure and dynamics of complex formation between small particles and large polymer
Source: Royal Society of Chemistry journal article supplement (doi:10.1039/c4ra00929k), 2014-01-01
Supplement: c4ra00929k2.pdf [file c4ra00929k2.pdf]

Supporting materials:

# Effect of Particle Polydispersity on the Structure and Dynamics of Complex Formation between Small Particles and Large Polymer

*Lei Ye<sup>a\*</sup>, Xiao Chu<sup>a</sup>, Zhengdong Zhang<sup>b</sup>, Ying Kan<sup>b</sup>, Yue Xie<sup>a</sup>, Isabelle Grillo<sup>d</sup>, Jiang  
Zhao<sup>a</sup>, Cécile A. Dreiss<sup>c\*</sup> and Dong Qiu<sup>a\*</sup>*

a. Beijing National Laboratory for Molecular Sciences, State Key Laboratory of Polymer Physics and Chemistry, Institute of Chemistry, Chinese Academy of Sciences, Beijing 100190, China. E-mail: [yelei@iccas.ac.cn](mailto:yelei@iccas.ac.cn), [dqiu@iccas.ac.cn](mailto:dqiu@iccas.ac.cn)

b. National Institute of Metrology, Beijing 100013, China

c. Institute of Pharmaceutical Science, King's College London, London SE1 9NH, U.K. E-mail: [Cecile.dreiss@kcl.ac.uk](mailto:Cecile.dreiss@kcl.ac.uk)

d. Institute Laue Langevin, F-38042 Grenoble, France

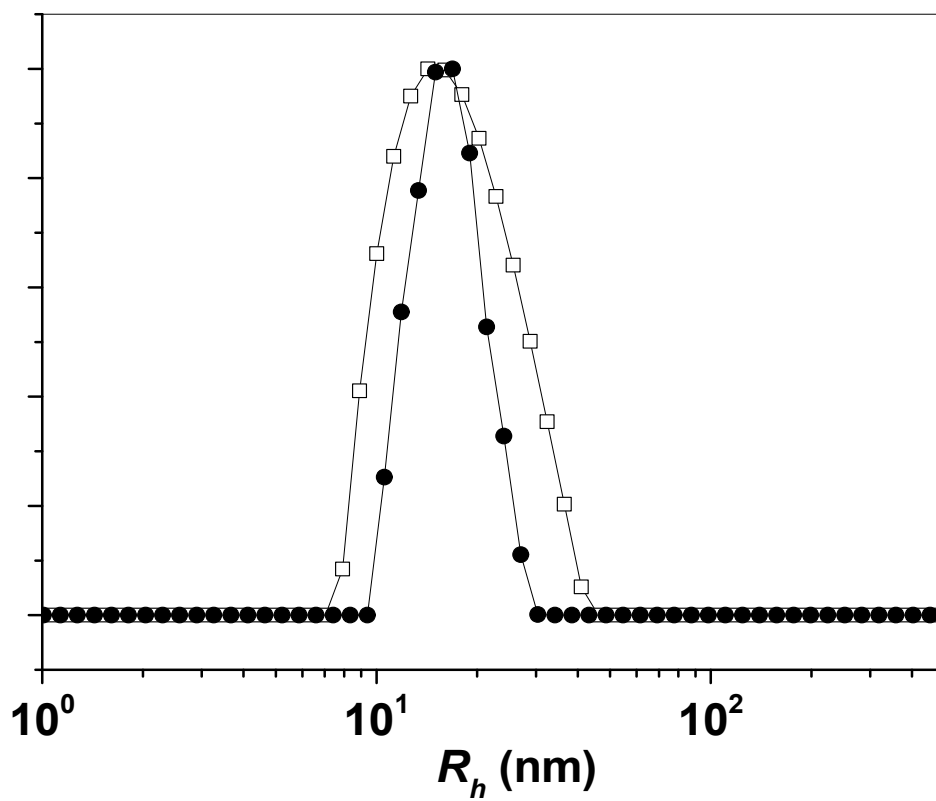

**Fig. S1** Size distribution function of silica particles by DLS: ●TM40, □BINDZIL2040.

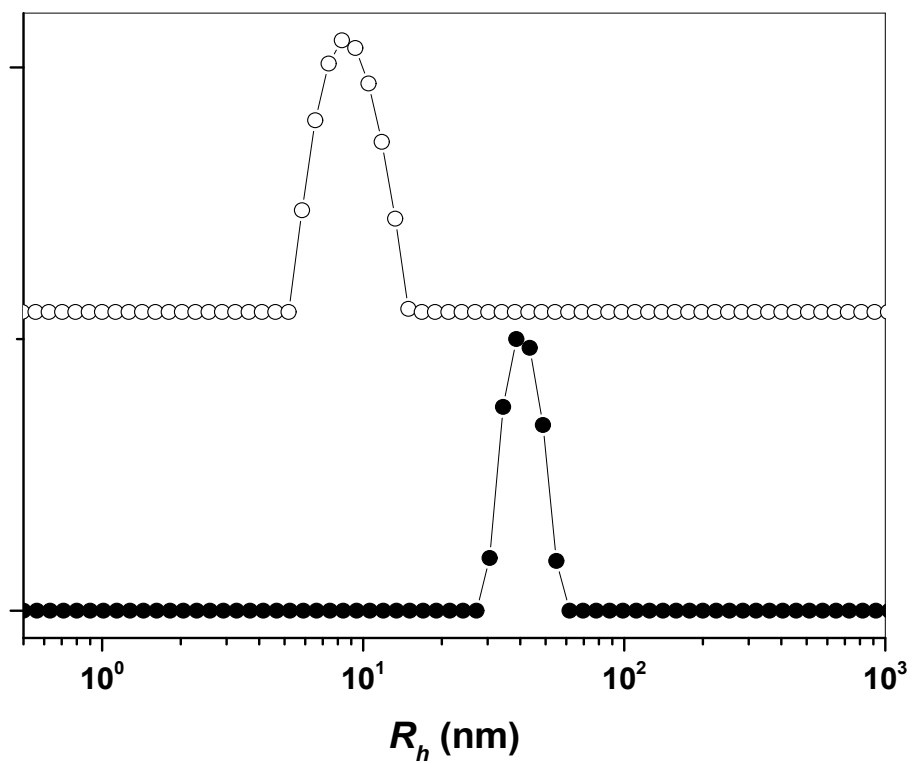

**Fig. S2** Size distribution function of silica particles by DLS: ○ 30R12, ● 30R50
